# Supplementary material for: The biocompatibility evaluation of iron oxide nanoparticles synthesized by a one pot process for intravenous iron supply
Source: Royal Society of Chemistry journal article supplement (doi:10.1039/c5ra25729h), 2016-01-01
Supplement: c5ra25729h1.pdf [file c5ra25729h1.pdf]

## The biocompatibility evaluation of iron oxide nanoparticles synthesized by one pot process for intravenous iron supply

Juanjuan Li<sup>†, a, b</sup>, Yang Liu<sup>†, a, b</sup>, Ruitao Cha,<sup>\*, a</sup> Bei Ran,<sup>a, c</sup> Kaiwen Mou,<sup>a, d</sup> Huashan Wang,<sup>b</sup> Qian Xie,<sup>\*, e</sup> Jiashu Sun,<sup>a</sup> Xingyu Jiang<sup>\*, a</sup>

<sup>a</sup> *Beijing Engineering Research Center for BioNanotechnology and CAS Key Laboratory for Biological Effects of Nanomaterials and Nanosafety, National Center for NanoScience and Technology, Beijing 100190, China;*

<sup>b</sup> *School of Chemical Engineering and Material Science, Tianjin University of Science and Technology, Tianjin 300457, China;*

<sup>c</sup> *State Key Laboratory of Biotherapy/Collaborative Innovation Center for Biotherapy, West China Hospital, Sichuan University, Chengdu, 610041, China;*

<sup>d</sup> *Ocean University of China, Qingdao 266100, China;*

<sup>e</sup> *Division of Nephrology, Peking University Third Hospital, Beijing 100191, China*  
*E-mail: chart@nanocr.cn, xieqian\_2001@hotmail.com, xingyujiang@nanocr.cn*

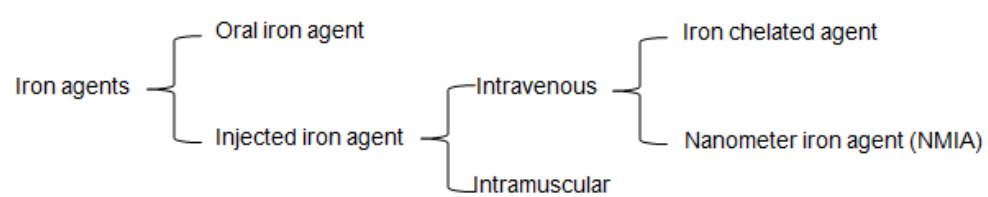

Fig. S1. The classification diagram of iron agents.

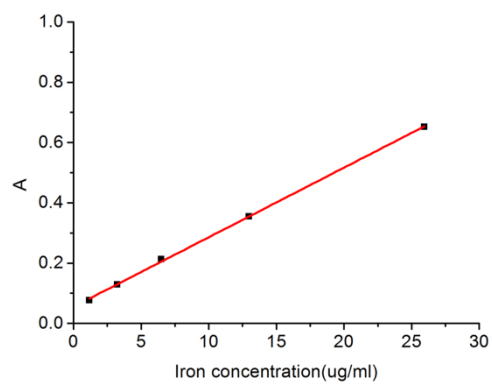

Fig. S2 Standard curve of iron ion concentrations from 25.94  $\mu\text{g/ml}$  to 1.18  $\mu\text{g/ml}$  measured at 478 nm by multimode reader.

$$Y=0.023X+0.055, R^2=0.9998$$

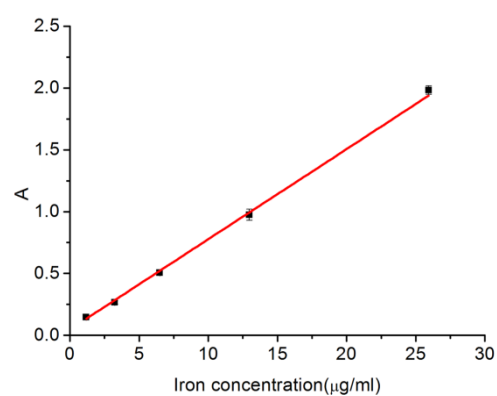

Fig. S3 Standard curve of iron ion concentrations from 25.94  $\mu\text{g/ml}$  to 1.18  $\mu\text{g/ml}$   
measured by Uv-vis.  
 $Y=0.072X+0.046$ ,  $R^2=0.9995$

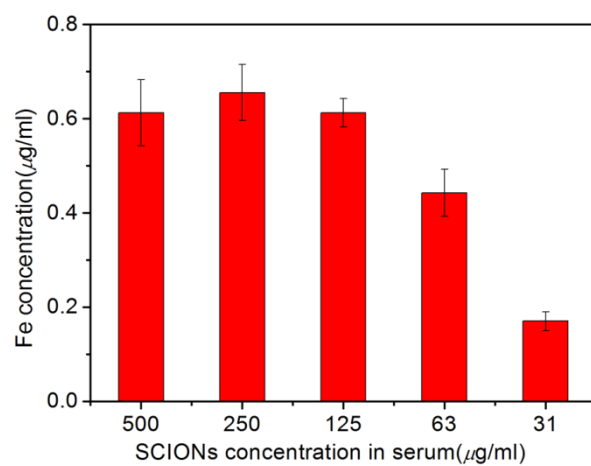

Fig. S4 Iron concentration in water through ultrafiltration after the addition of SCIONs

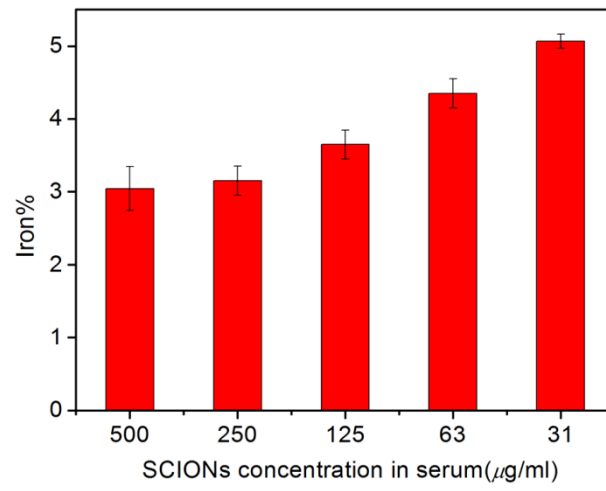

Fig. S5 Dissolved percent of SCIONs in serum after 24 h.
